# Supplementary material for: Public knowledge and attitudes concerning palliative care
Source: HighWire-hosted journal article supplement (doi:10.1136/bmjspcare-2021-003340), 2021-10-07

## Online Supplementary Content

### **eText. Definition of palliative care provided to survey participants**

The World Health Organization defines palliative care as care that is focused on improving quality of life and relieving suffering for patients living with any serious illness and for their families. Palliative care uses a healthcare team approach to provide patients of any age and their families with a support system that can include physical, emotional and spiritual care. Palliative care can be involved early in the course of the patient's illness, not only at the end of a person's life, and together with other medical treatments.

**eTable 1. Characteristics of participant sample compared to non-participants and excluded participants**

| Characteristics            | Survey participants<br>N=2422<br><br>Number (%) | Non-participants<br>N=1852<br><br>Number (%) | p      | Eligible participant sample<br>N=1518<br><br>Number (%) | Excluded participants                              |        |                                                       |      |                                                  |        |
|----------------------------|-------------------------------------------------|----------------------------------------------|--------|---------------------------------------------------------|----------------------------------------------------|--------|-------------------------------------------------------|------|--------------------------------------------------|--------|
|                            |                                                 |                                              |        |                                                         | Target met <sup>a</sup><br>N=646<br><br>Number (%) | p      | Non-completers <sup>b</sup><br>N=95<br><br>Number (%) | p    | Speeders <sup>c</sup><br>N=152<br><br>Number (%) | p      |
|                            |                                                 |                                              |        |                                                         |                                                    |        |                                                       |      |                                                  |        |
| <b>Region</b>              |                                                 |                                              | <.0001 |                                                         |                                                    | <.0001 |                                                       | 0.34 |                                                  | 0.22   |
| British Columbia           |                                                 |                                              |        | 182 (12.0)                                              | 33 (5.1)                                           |        | 15 (15.8)                                             |      | 23 (15.1)                                        |        |
| West <sup>d</sup>          | 618 (25.5)                                      | 449 (24.2)                                   |        | 271 (17.9)                                              | 54 (8.4)                                           |        | 14 (14.7)                                             |      | 26 (17.1)                                        |        |
| Ontario                    | 1050 (43.4)                                     | 614 (33.2)                                   |        | 512 (33.7)                                              | 435 (67.3)                                         |        | 38 (40.0)                                             |      | 59 (38.8)                                        |        |
| Quebec                     | 449 (18.5)                                      | 474 (25.6)                                   |        | 348 (22.9)                                              | 48 (7.4)                                           |        | 20 (21.1)                                             |      | 32 (21.1)                                        |        |
| Atlantic <sup>e</sup>      | 302 (12.5)                                      | 315 (17.0)                                   |        | 205 (13.5)                                              | 76 (11.8)                                          |        | 8 (8.4)                                               |      | 12 (7.9)                                         |        |
| Residing outside of Canada | 3 (0.1)                                         | 0                                            |        |                                                         |                                                    |        |                                                       |      |                                                  |        |
| <b>Age</b>                 |                                                 |                                              | <.0001 |                                                         |                                                    | <.0001 |                                                       | 0.96 |                                                  | <.0001 |
| Under 18                   | 8 (0.3)                                         | 0                                            |        |                                                         |                                                    |        |                                                       |      |                                                  |        |
| 18-24                      | 191 (7.9)                                       | 56 (3.0)                                     |        | 143 (9.4)                                               | 10 (1.6)                                           |        | 9 (9.7)                                               |      | 29 (19.1)                                        |        |
| 25-34                      | 399 (16.5)                                      | 201 (10.9)                                   |        | 268 (17.7)                                              | 66 (10.2)                                          |        | 19 (20.4)                                             |      | 46 (30.3)                                        |        |
| 35-44                      | 489 (20.2)                                      | 318 (17.2)                                   |        | 280 (18.4)                                              | 145 (22.5)                                         |        | 14 (15.1)                                             |      | 50 (32.9)                                        |        |
| 45-54                      | 383 (15.8)                                      | 319 (17.2)                                   |        | 284 (18.7)                                              | 69 (10.7)                                          |        | 18 (19.4)                                             |      | 12 (7.9)                                         |        |
| 55-64                      | 447 (18.5)                                      | 389 (21.0)                                   |        | 278 (18.3)                                              | 143 (22.1)                                         |        | 13 (14.0)                                             |      | 13 (8.6)                                         |        |
| 65+                        | 500 (20.6)                                      | 569 (30.7)                                   |        | 265 (17.5)                                              | 213 (34.0)                                         |        | 20 (21.5)                                             |      | 2 (1.3)                                          |        |
| Missing                    | 5                                               | 0                                            |        | 0                                                       |                                                    |        | 2                                                     |      | 0                                                |        |
| <b>Gender</b>              |                                                 |                                              | 0.13   |                                                         |                                                    | 0.03   |                                                       | 0.66 |                                                  | 0.002  |
| Male                       | 1137 (47.2)                                     | 846 (45.7)                                   |        | 722 (47.6)                                              | 276 (42.7)                                         |        | 40 (44.0)                                             |      | 99 (65.1)                                        |        |
| Female                     | 1264 (52.5)                                     | 1006 (54.3)                                  |        | 790 (52.0)                                              | 370 (57.3)                                         |        | 51 (56.0)                                             |      | 53 (34.9)                                        |        |
| Other                      | 4 (0.2)                                         | 0                                            |        | 4 (0.3)                                                 | 0                                                  |        | 0                                                     |      | 0                                                |        |
| Prefer not to answer       | 2 (0.1)                                         | 0                                            |        | 2 (0.1)                                                 | 0                                                  |        | 0                                                     |      | 0                                                |        |
| Missing                    | 15                                              | 0                                            |        | 0                                                       | 0                                                  |        | 4                                                     |      | 0                                                |        |

<sup>a</sup> Participants who exceeded the set targets for age, gender, and region according to Statistics Canada data and were subsequently excluded

<sup>b</sup> Participants who did not complete the last page of the survey

<sup>c</sup> Participants with a survey completion time of less than 50% of the median

<sup>d</sup> West includes British Columbia, Alberta, Saskatchewan, and Manitoba for the comparison between n=2422 participants and n=1852 non-participants; West excludes British Columbia for the comparison of n=1518 eligible participants vs excluded participants.

<sup>e</sup> Atlantic region includes New Brunswick, Nova Scotia, Prince Edward Island, and Newfoundland and Labrador.

**Table 2. Demographic characteristics according to actual knowledge of palliative care (n=1518)**

| Respondent characteristics                  | Actual knowledge of WHO definition of palliative care <sup>a</sup> |                        | p                |
|---------------------------------------------|--------------------------------------------------------------------|------------------------|------------------|
|                                             | Number (weighted %) [95% CI]                                       |                        |                  |
|                                             | High<br>N=532                                                      | Low<br>N=986           |                  |
| <b>Age, years</b>                           |                                                                    |                        | <b>&lt;.0001</b> |
| 18 – 24                                     | 29 (6.4) [4.1-8.6]                                                 | 114 (14.3) [11.8-16.7] |                  |
| 25 – 34                                     | 82 (14.9) [11.9-18.0]                                              | 186 (18.4) [16.0-20.9] |                  |
| 35 – 44                                     | 93 (16.2) [13.0-19.3]                                              | 187 (17.5) [15.1-19.8] |                  |
| 45 – 54                                     | 101 (19.3) [15.8-22.8]                                             | 183 (18.5) [16.0-20.9] |                  |
| 55 – 64                                     | 127 (24.2) [20.5-28.0]                                             | 151 (15.3) [13.0-17.6] |                  |
| >= 65                                       | 100 (19.0) [15.6-22.5]                                             | 165 (16.1) [13.8-18.4] |                  |
| <b>Gender</b>                               |                                                                    |                        | <b>0.81</b>      |
| Male                                        | 254 (48.9) [44.5-53.2]                                             | 468 (49.0) [45.7-52.2] |                  |
| Female                                      | 276 (50.8) [46.4-55.1]                                             | 514 (50.8) [47.6-54.1] |                  |
| Non-binary                                  | 2 (0.4) [0-0.9]                                                    | 2 (0.2) [0-0.5]        |                  |
| <b>Highest level of education</b>           |                                                                    |                        | <b>0.39</b>      |
| High school or less                         | 118 (22.6) [18.9-26.3]                                             | 233 (23.7) [21.0-26.5] |                  |
| College/<br>Technical degree                | 226 (43.1) [38.8-47.5]                                             | 382 (39.4) [36.2-42.5] |                  |
| University/Graduate/<br>Professional degree | 182 (34.3) [30.1-38.4]                                             | 360 (36.9) [33.8-40.0] |                  |
| <b>Marital status</b>                       |                                                                    |                        | <b>0.03</b>      |
| Married/<br>Common law                      | 297 (55.9) [51.5-60.2]                                             | 503 (50.0) [46.8-53.2] |                  |
| Other <sup>b</sup>                          | 231 (44.1) [39.8-48.5]                                             | 478 (50.0) [46.8-53.2] |                  |
| <b>Household income, CAD\$</b>              |                                                                    |                        | <b>0.01</b>      |
| < 25,000                                    | 77 (15.5) [12.2-18.7]                                              | 156 (17.6) [15.0-20.2] |                  |
| 25,000 - 49,999                             | 116 (23.1) [19.3-26.9]                                             | 240 (26.8) [23.8-29.8] |                  |
| 50,000 - 74,999                             | 101 (20.8) [17.1-24.5]                                             | 177 (20.2) [17.5-22.9] |                  |
| 75,000 – 99,999                             | 76 (15.1) [11.9-18.3]                                              | 127 (14.7) [12.3-17.1] |                  |
| 100,000 – 149,999                           | 79 (15.3) [12.1-18.5]                                              | 132 (14.7) [12.3-17.1] |                  |
| >= 150,000                                  | 48 (10.2) [7.5-13.0]                                               | 51 (5.9) [4.3-7.5]     |                  |
| <b>Employment</b>                           |                                                                    |                        | <b>0.0006</b>    |
| Employed/Self-employed                      | 305 (57.0) [52.7-61.4]                                             | 542 (55.6) [52.4-58.9] |                  |
| Retired/Semi-retired                        | 140 (27.0) [23.1-31.0]                                             | 203 (20.5) [17.9-23.1] |                  |
| Student                                     | 15 (3.2) [1.6-4.8]                                                 | 50 (6.5) [4.8-8.3]     |                  |
| Homemaker/on disability/<br>Unemployed      | 67(12.7) [9.8-15.7]                                                | 172 (17.3) [14.9-19.8] |                  |
| <b>Ethnic background</b>                    |                                                                    |                        | <b>0.16</b>      |

|                                                                                      |                                             |                        |                        |                  |
|--------------------------------------------------------------------------------------|---------------------------------------------|------------------------|------------------------|------------------|
|                                                                                      | European origins                            | 352 (68.7) [64.5-72.8] | 608 (64.9) [61.7-68.1] |                  |
|                                                                                      | Other <sup>c</sup>                          | 155 (31.3) [27.2-35.5] | 315 (35.1) [31.9-38.3] |                  |
| <b>Religion</b>                                                                      |                                             |                        |                        | <b>0.052</b>     |
|                                                                                      | Christianity                                | 288 (57.5) [53.1-62.0] | 487 (51.5) [48.2-54.7] |                  |
|                                                                                      | Other religions <sup>d</sup>                | 41 (8.1) [5.7-10.5]    | 98 (11.1) [9.0-13.3]   |                  |
|                                                                                      | No religion                                 | 175 (34.3) [30.1-38.6] | 352 (37.4) [34.2-40.6] |                  |
| <b>Region</b>                                                                        |                                             |                        |                        | <b>0.51</b>      |
|                                                                                      | British Columbia                            | 61 (12.0) [9.2-14.9]   | 121 (13.0) [10.8-15.2] |                  |
|                                                                                      | Ontario                                     | 166 (36.2) [31.9-40.5] | 346 (39.3) [36.1-42.4] |                  |
|                                                                                      | Quebec                                      | 130 (25.5) [21.6-29.3] | 218 (22.4) [19.7-25.0] |                  |
|                                                                                      | West (except British Columbia) <sup>e</sup> | 94 (18.6) [15.2-22.0]  | 177 (18.7) [16.2-21.2] |                  |
|                                                                                      | Atlantic <sup>f</sup>                       | 81 (7.7) [6.0-9.4]     | 124 (6.6) [5.4-7.8]    |                  |
| <b>Born in Canada</b>                                                                |                                             |                        |                        | <b>0.09</b>      |
|                                                                                      | Yes                                         | 445 (83.2) [79.9-86.5] | 790 (79.6) [77.0-82.2] |                  |
|                                                                                      | No                                          | 84 (16.8) [13.5-20.1]  | 191 (20.4) [17.8-23.0] |                  |
| <b>Years living in Canada (N=275)</b>                                                |                                             |                        |                        | <b>0.0007</b>    |
|                                                                                      | 0-10                                        | 14 (15.2) [7.4-22.9]   | 62 (34.0) [27.0-41.1]  |                  |
|                                                                                      | 11-20                                       | 11 (13.7) [6.0-21.3]   | 35 (19.8) [13.8-25.8]  |                  |
|                                                                                      | 21-30                                       | 13 (16.0) [7.8-24.1]   | 33 (17.5) [12.0-23.0]  |                  |
|                                                                                      | 31-40                                       | 13 (15.7) [7.6-23.7]   | 17 (8.7) [4.6-12.7]    |                  |
|                                                                                      | > 40                                        | 32 (39.6) [28.6-50.5]  | 39 (20.0) [14.2-25.9]  |                  |
| <b>Healthcare professional</b>                                                       |                                             |                        |                        | <b>&lt;.0001</b> |
|                                                                                      | Yes                                         | 68 (12.3) [9.5-15.2]   | 61 (6.2) [4.7-7.8]     |                  |
|                                                                                      | No                                          | 464 (87.7) [84.8-90.5] | 925 (93.8) [92.2-95.3] |                  |
| <b>Live with a healthcare professional</b>                                           |                                             |                        |                        | <b>0.65</b>      |
|                                                                                      | Yes                                         | 39 (7.7) [5.3-10.1]    | 66 (7.0) [5.3-8.7]     |                  |
|                                                                                      | No                                          | 493 (92.3) [89.9-94.7] | 920 (93.0) [91.3-94.7] |                  |
| <b>Participant or loved one diagnosed with a serious or life-threatening illness</b> |                                             |                        |                        | <b>0.38</b>      |
|                                                                                      | Yes                                         | 300 (57.8) [53.4-62.2] | 527 (55.4) [52.1-58.6] |                  |
|                                                                                      | No                                          | 223 (42.2) [37.8-46.5] | 423 (44.6) [41.4-47.9] |                  |
| <b>Main source of information about palliative care (N=1362)</b>                     |                                             |                        |                        | <b>&lt;.0001</b> |
|                                                                                      | Friends, family, colleagues                 | 202 (40.6) [36.1-45.1] | 312 (42.7) [38.9-46.4] |                  |
|                                                                                      | Healthcare professional/MD                  | 181 (37.5) [33.0-41.9] | 178 (25.5) [22.2-28.8] |                  |
|                                                                                      | Traditional media                           | 53 (11.1) [8.2-14.0]   | 137 (19.1) [16.2-22.1] |                  |
|                                                                                      | Social media                                | 10 (2.2) [0.9-3.6]     | 22 (3.4) [2.0-4.9]     |                  |
|                                                                                      | Social services/<br>Agencies/<br>Programs   | 24 (5.0) [3.0-7.0]     | 35 (4.9) [3.3-6.5]     |                  |
|                                                                                      | Other <sup>g</sup>                          | 18 (3.5) [1.9-5.2]     | 30 (4.4) [2.8-5.9]     |                  |

<sup>a</sup> High actual knowledge of WHO palliative care definition: “Yes, I knew this” to at least 5/8 components, including that palliative care “can be provided with other medical treatments aimed at prolonging life” and that palliative care “can be provided early in the course of illness”; the remainder were classified as having low actual knowledge.

<sup>b</sup> Other marital status includes single, separated, divorced, widowed/widower

<sup>c</sup> Other ethnic backgrounds include African, Asian/Pacific Island, Latin American, Middle Eastern, North American Aboriginal, other not specified

<sup>d</sup> Other religions include Buddhism, Hinduism, Judaism, Islam, Sikhism, other not specified

<sup>e</sup> West includes Alberta, Saskatchewan, and Manitoba.

<sup>f</sup> Atlantic region includes New Brunswick, Nova Scotia, Prince Edward Island, and Newfoundland and Labrador. <sup>g</sup> Other main sources include insurance company, politicians, religious leaders at place of worship, other not specified.

Number missing or preferred not to answer: Gender 2, Education 17, Marital status 9, Household income 138, Employment 24, Ethnic background 88, Religion 77, Born in Canada 8, Participant or loved one diagnosed with a serious or life-threatening illness 45, Participant or loved one diagnosed with a serious or life-threatening illness 45, Main source of information about palliative care 160.

Abbreviations: CI, confidence interval; WHO, World Health Organization

**eFigure: Study flow diagram**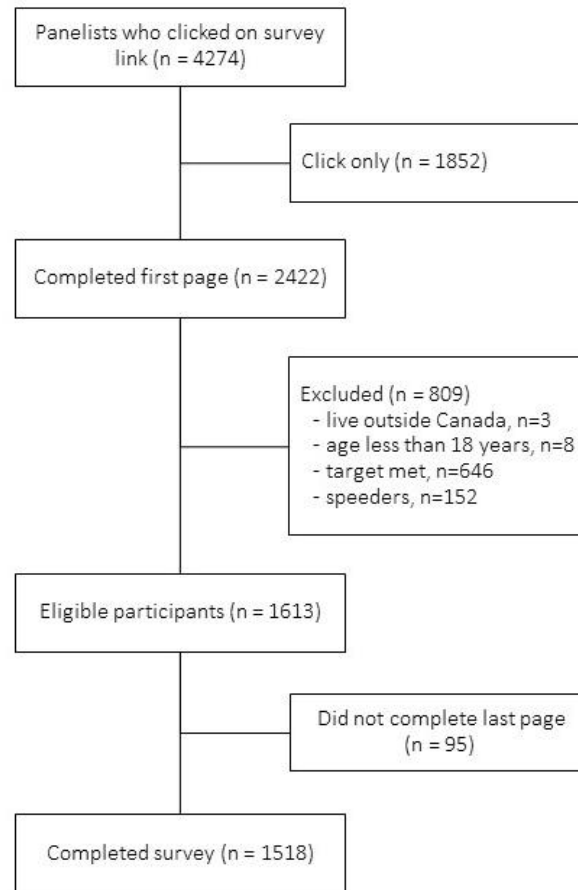

Supplement: bmjspcare-2021-003340supp001_data_supplement.pdf [file bmjspcare-2021-003340supp001_data_supplement.pdf]
